# Supplementary material for: Profiling and Functional Analysis of microRNA Deregulation in Cancer-Associated Fibroblasts in Oral Squamous Cell Carcinoma Depicts an Anti-Invasive Role of microRNA-204 via Regulation of Their Motility
Source: MDPI journal article supplement (doi:10.3390/ijms222111960), 2021-11-04
Supplement: s1 [file s1]

**Supplementary Table S1.** Patient information

| <i>ID</i>                                      | <i>Age<br/>Gender</i> | <i>site</i>    | <i>TNM</i> | <i>Differentiation</i> | <i>Later<br/>metastasis</i> | <i>Smoking</i> | <i>Survival<br/>(months)</i> |
|------------------------------------------------|-----------------------|----------------|------------|------------------------|-----------------------------|----------------|------------------------------|
| <b><i>Donors of CAF-NOF matched pairs</i></b>  |                       |                |            |                        |                             |                |                              |
| 7m                                             | 68, M                 | gingiva        | T4N2M0     | middle                 | bone, lung                  | yes            | 20                           |
| 8m                                             | 69, M                 | floor of mouth | T4N1M0     | middle                 | bone                        | yes            | 9                            |
| 10m                                            | 51, M                 | tongue         | T2N2bM0    | high                   | no                          | -              | alive                        |
| 15m                                            | 66, M                 | gingiva        | T4N0M0     | poor                   | -                           | yes            | 1                            |
| 21m                                            | 62, M                 | tongue         | T2N1M0     | high                   | lung, liver                 | yes            | 8                            |
| <b><i>Donors of CAF (un-matched group)</i></b> |                       |                |            |                        |                             |                |                              |
| 7                                              | 80, F                 | buccal         | T2N2M0     | high                   | no                          | no             | 12                           |
| 9                                              | 66, F                 | buccal         | T2N2M0     | high                   | no                          | no             | alive                        |
| 10                                             | 49, M                 | tongue         | T3N1M0     | middle                 | no                          | yes            | 96                           |
| 11                                             | 57, M                 | tongue         | T4N2M0     | middle                 | -                           | -              | -                            |
| 12                                             | 52, M                 | tongue         | T3N1M0     | poor                   | -                           | -              | -                            |
| 13                                             | 72, M                 | floor of mouth | T4N1M0     | middle                 | -                           | yes            | -                            |
| 24                                             | 63, F                 | tongue         | T3N1M0     | high                   | bone                        | no             | 16                           |
| 25                                             | 42, M                 | gingiva        | T4N1M0     | high                   | lung, bone                  | no             | 12                           |

**Supplementary Table S2.** List of Taqman Assays (ThermoFisher, USA)

| <i>Genes</i>   | <i>Taqman Assay ID</i> |
|----------------|------------------------|
| hsa-miR-204-5p | 000508                 |
| hsa-miR-138-5p | 002284                 |
| hsa-miR-582-5p | 001983                 |
| RNU48          | 001006                 |
| ITGA11         | Hs00201927_m1          |
| PTK2           | Hs01056457_m1          |
| EGFR           | Hs01076090_m1          |
| GAPDH          | Hs99999905_m1          |
| FAP            | Hs00990806_m1          |
| TGFB1          | Hs00998130_m1          |
| ROCK2          | Hs00178154_m1          |
| 18s            | Hs99999901_s1          |
| TGFBR2         | Hs00559660_m1          |
| RPL13A         | Hs04194366_g1          |

**Supplementary Table S3.** List of antibodies used for western blot.

| <b><i>1° Antibodies</i></b> | <b><i>Cat No</i></b>      | <b><i>Dilution</i></b> | <b><i>Protein block</i></b> |
|-----------------------------|---------------------------|------------------------|-----------------------------|
| ITGA11 [1]                  | -                         | 1:2000                 | 5% Dry milk                 |
| FAK (D2R2E)                 | #13009, Cell Signalling   | 1:1000                 | 3%BSA                       |
| p-FAK(Tyr397) (D20B1)       | #8556, Cell Signalling    | 1:1000                 | 3%BSA                       |
| FAP (SP325)                 | #ab207178 Abcam           | 1:1000                 | 5% Dry milk                 |
| TGFBR2 (E5M6F)              | # 41896S, Cell Signalling | 1:1000                 | 5% Dry milk                 |
| GAPDH                       | AB9484, Abcam             | 1:10000                | 5% Dry milk                 |
| B-Actin                     | #4967, Cell Signalling    | 1:5000                 | 5% Dry milk                 |

1. Velling T, Kusche-Gullberg M, Sejersen T, Gullberg D: **cDNA cloning and chromosomal localization of human alpha(11) integrin. A collagen-binding, I domain-containing, beta(1)-associated integrin alpha-chain present in muscle tissues.** *J Biol Chem* 1999, **274**(36):25735-25742.
